# Supplementary material for: Development of an instrument to analyze organizational characteristics in multidisciplinary care pathways; the case of colorectal cancer
Source: PubMed Central journal article supplement (PMC4396572; doi:10.1186/s13104-015-1084-1), 2015-04-09
Supplement: 13104_2015_1084_MOESM2_ESM.pdf [file 13104_2015_1084_MOESM2_ESM.pdf]

## Illustrative sample of a hospital scoring

### Patient groups

Eight hospitals participated in the survey, of which three were academic, one was a teaching hospital and four were non-teaching hospitals. A number of 472 patients underwent elective surgery due to a primary colorectal carcinoma. All other patients were excluded.

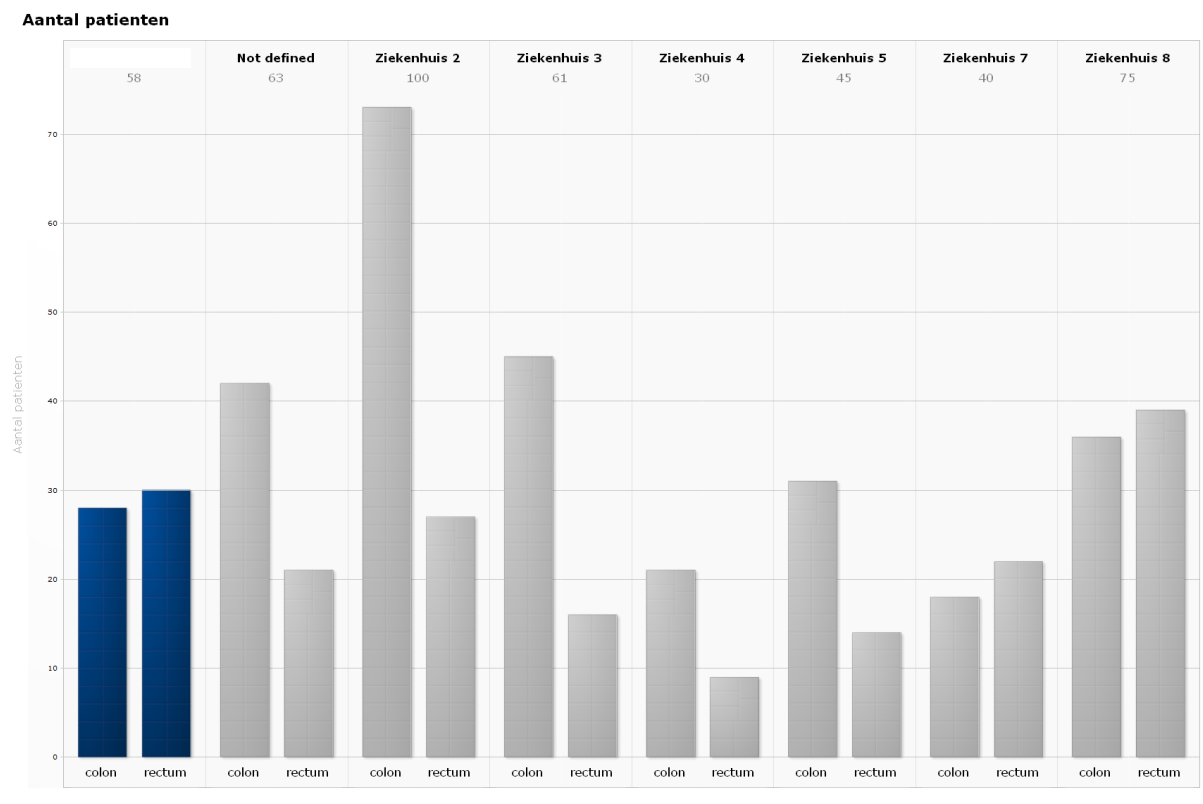

**Table 1.** Number of included elective patients per hospital with a specification for colon and rectum carcinoma. In the columns the hospital number is presented. 'Aantal patiënten' = number of patients. 'Ziekenhuis' = hospital.

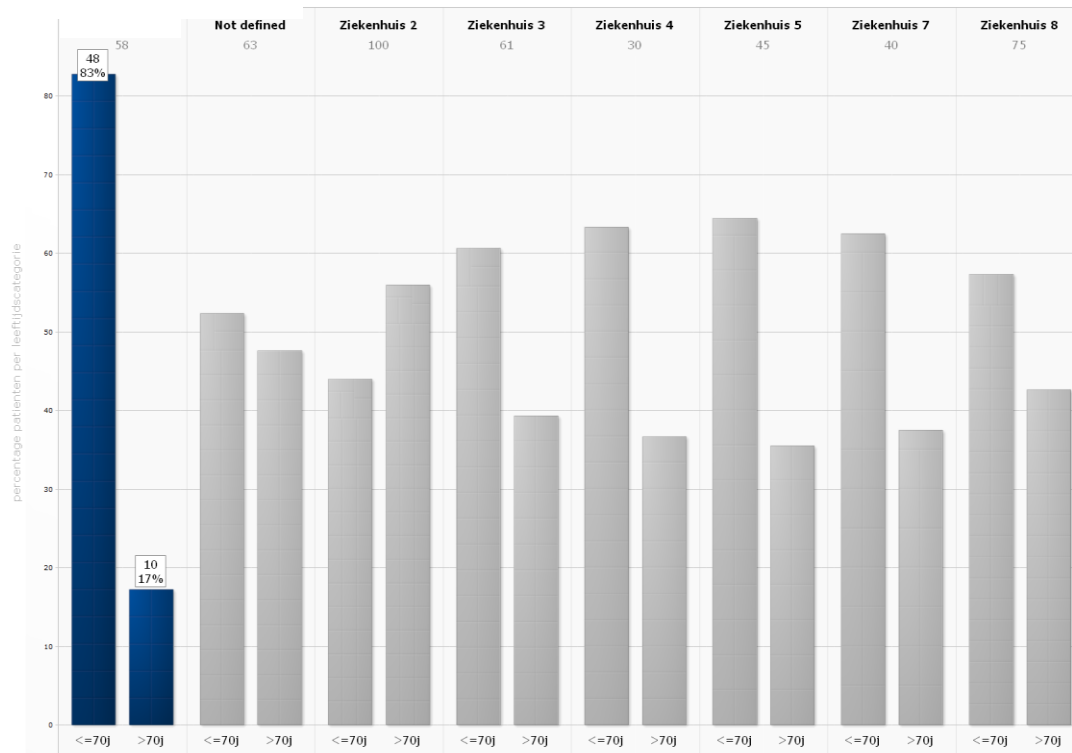

**Table 2.** Age per hospital during surgery. Divided in < 70 years and > 70 years. In the columns the hospital number is presented. 'Ziekenhuis' = hospital.

**BMI**

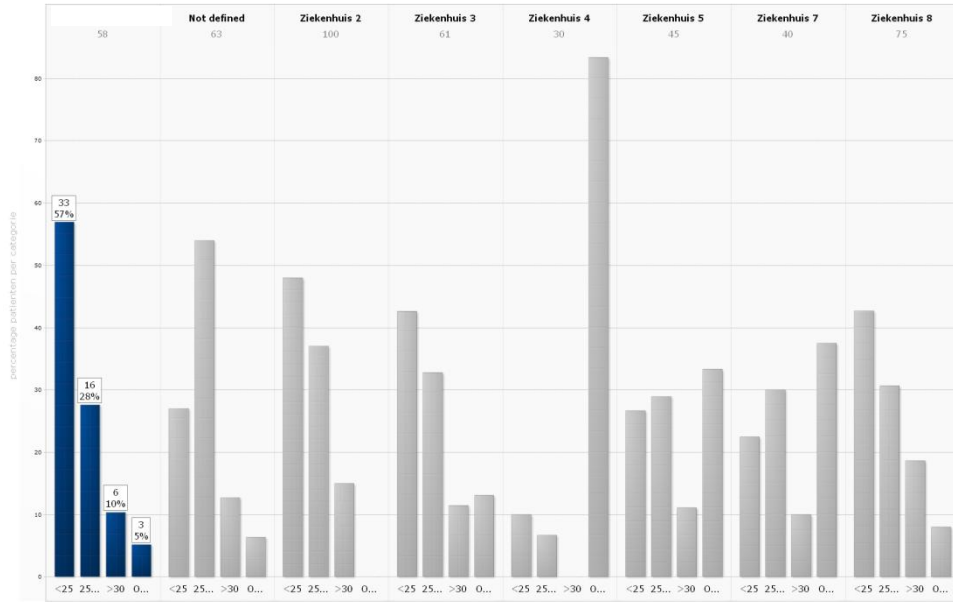

**Table 3.** Body Mass Index, divided in < 2, between 25 and 30 and > 30.

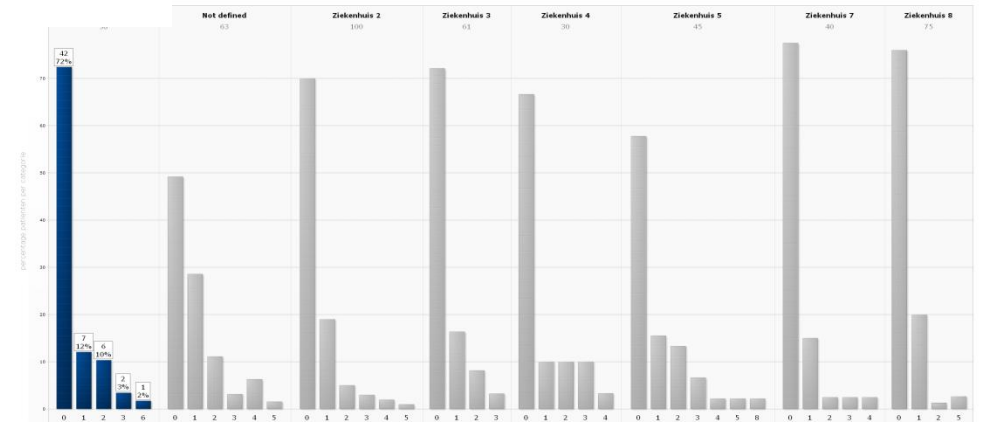

**Table 4.** Charleston Comorbidity Score. 'Ziekenhuis' = hospital

## Flowchart

A tailor-made flowchart with the patients-tread pathway.

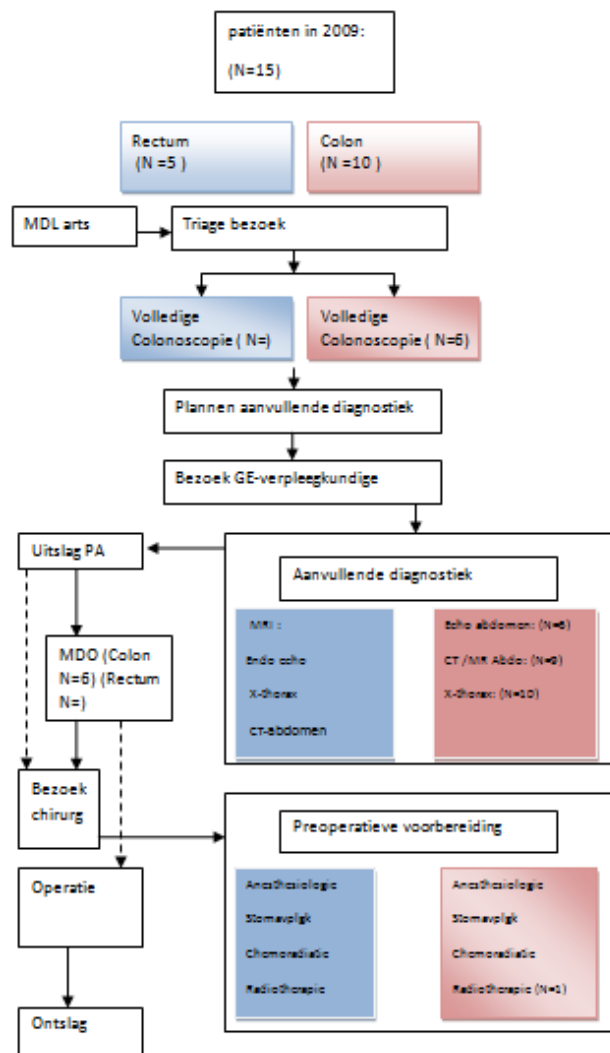

**Table 5.** Dutch example of a flow chart specified for patients with colon carcinoma and rectum carcinoma in your hospital.

## Throughput

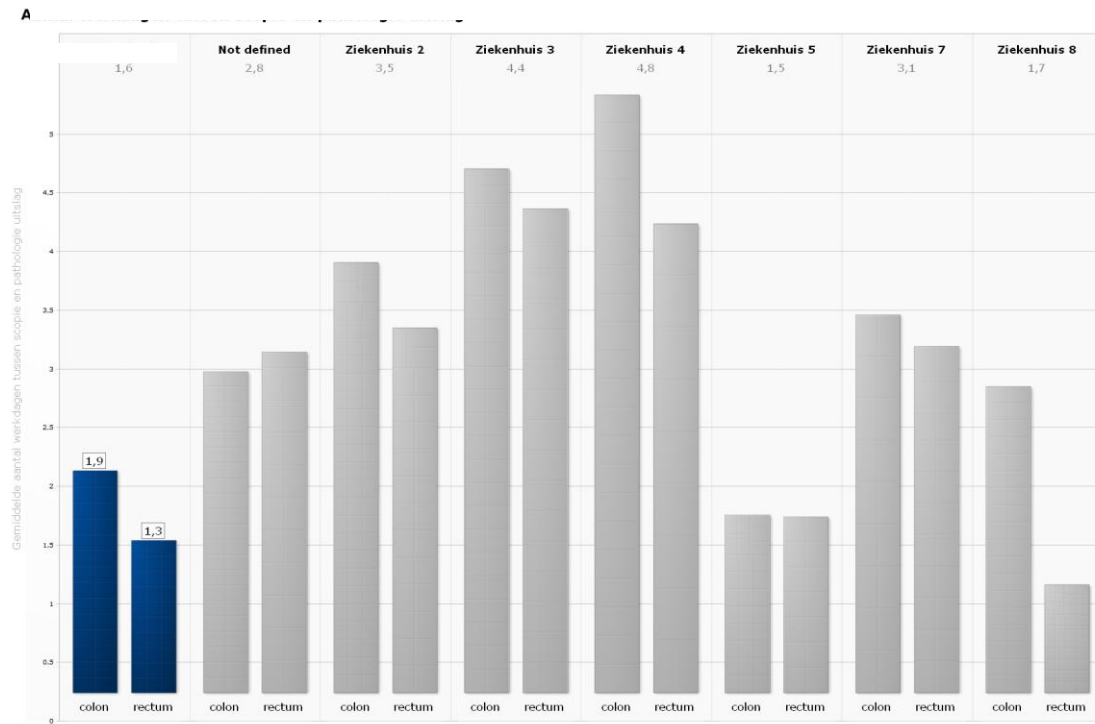

**Table 6.** Number of workdays between scopy and PA for colon and rectum. 'Ziekenhuis' = hospital.

## Number of patient visits

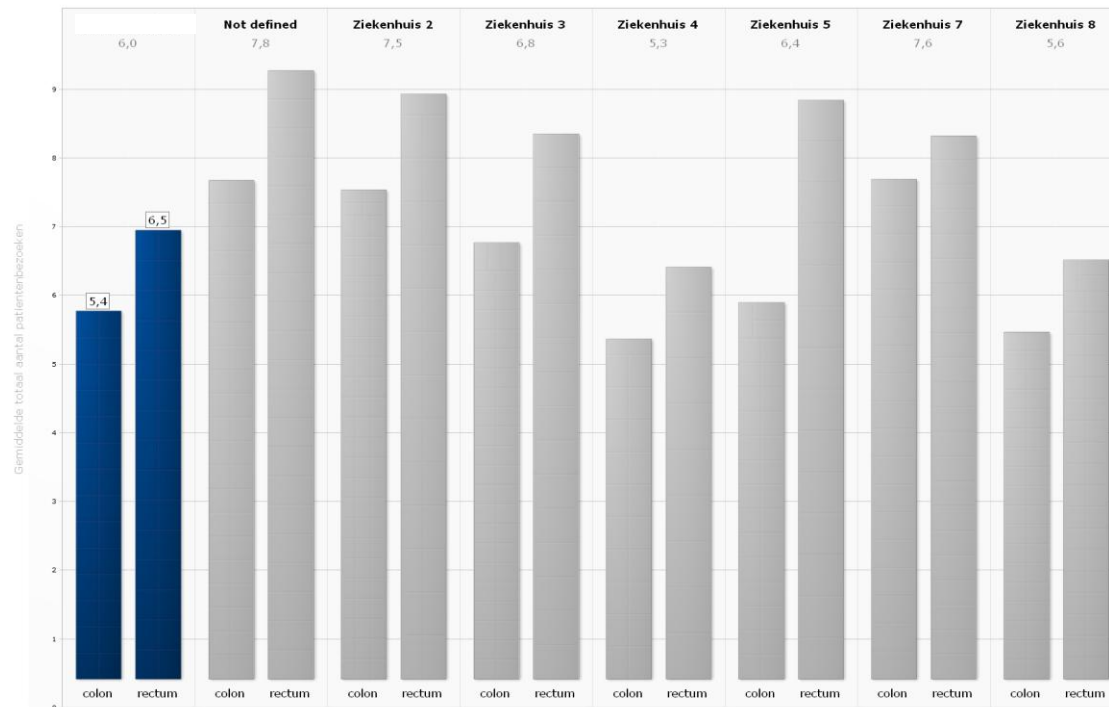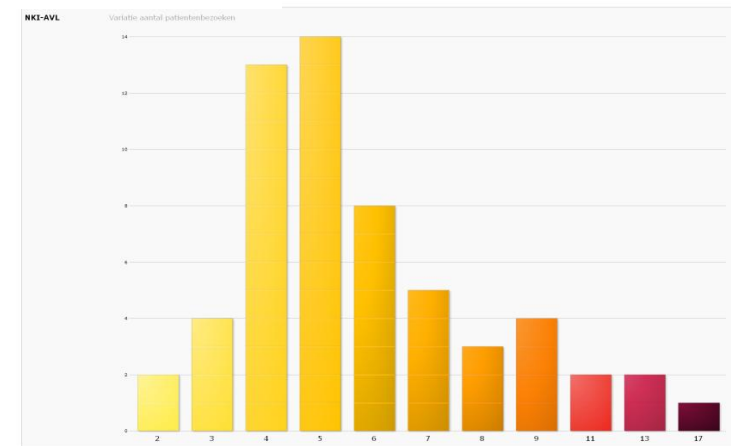

**Table 7 and 8.** The number of patient visits prior to surgery to outpatient clinics for colon and rectum ( surgery, anesthesiology and GE) and radiology. Variation of the number of visits in your own hospital. 'Ziekenhuis' = hospital.

## Patient related outcome

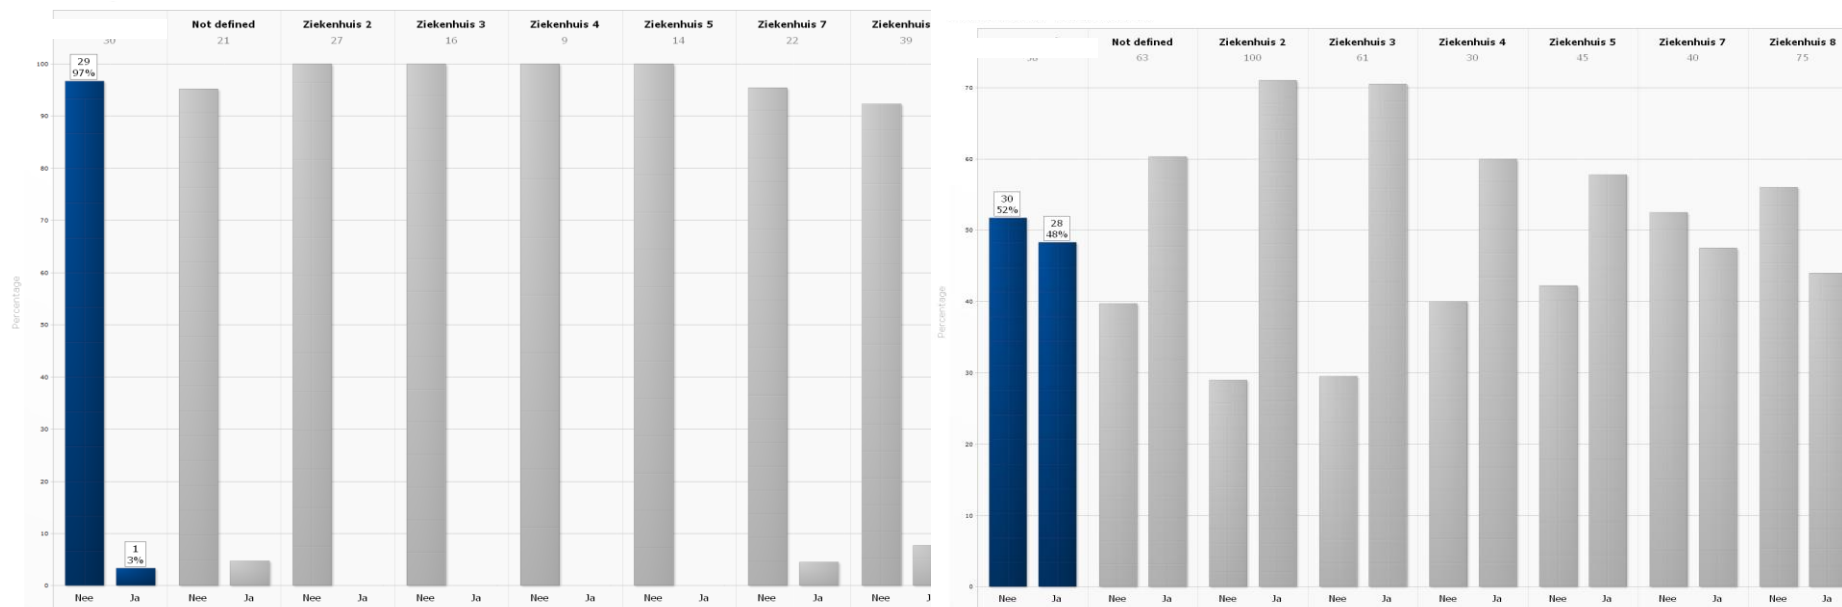

**Table 9 and 10.** Examples of patient related outcome: pre-operative imaging. liver and lung. Number of patients with imaging ( yes/no). 'Ziekenhuis' = hospital. 'Nee' = no, 'ja' = yes.

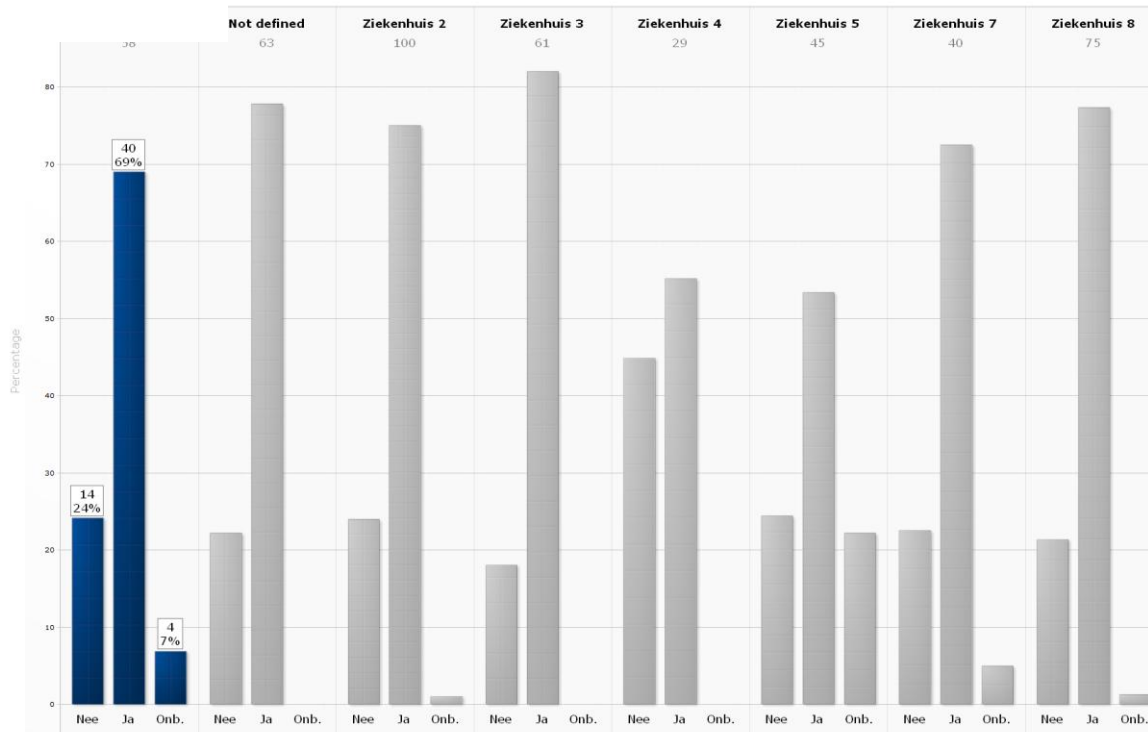

**Table 11.** Number of patients with a total colostomy ( no/yes/ unknown). 'Ziekenhuis' = hospital, 'Nee' = no, 'ja' = yes.



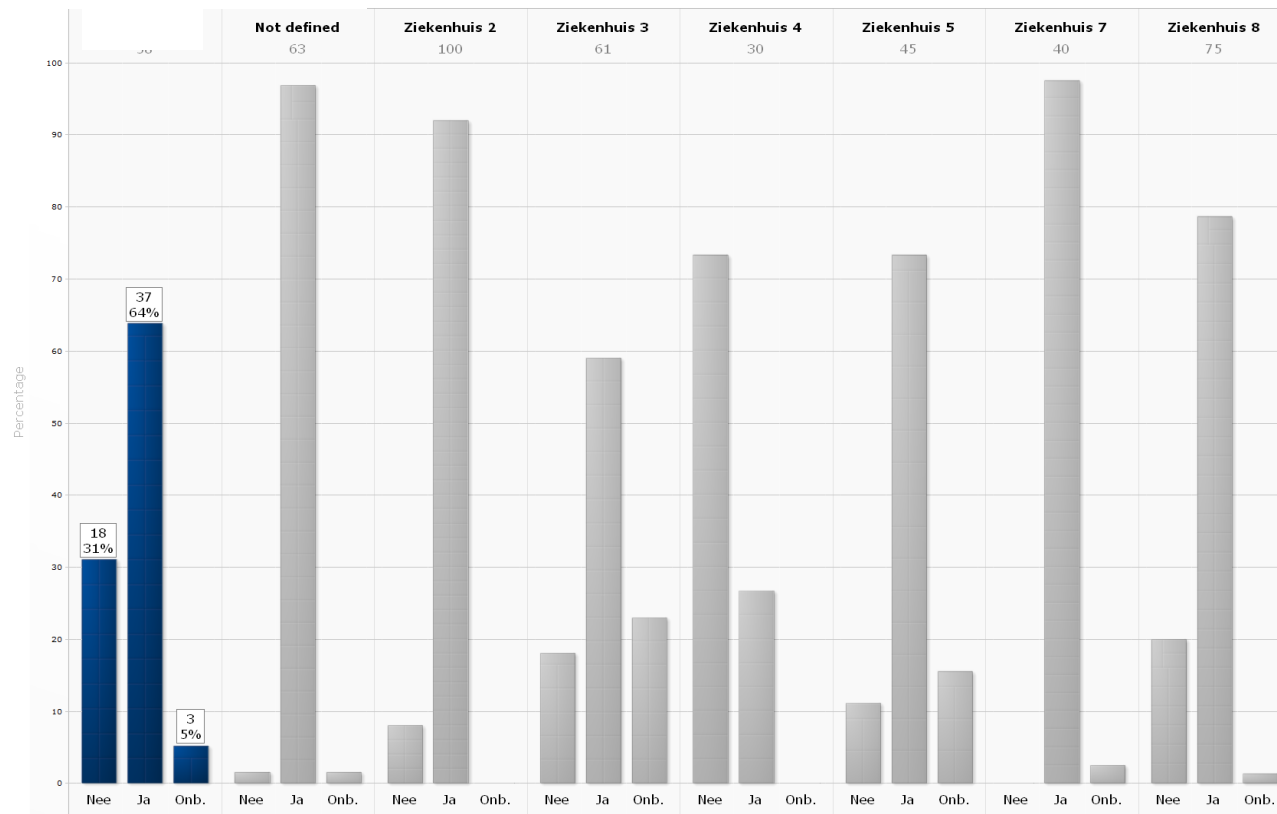

**Table 12.** Number of patients discussed in MDT ( no/yes/unknown). 'Ziekenhuis' = hospital. 'Nee' = no, 'Ja' = yes.

**Re interventions**

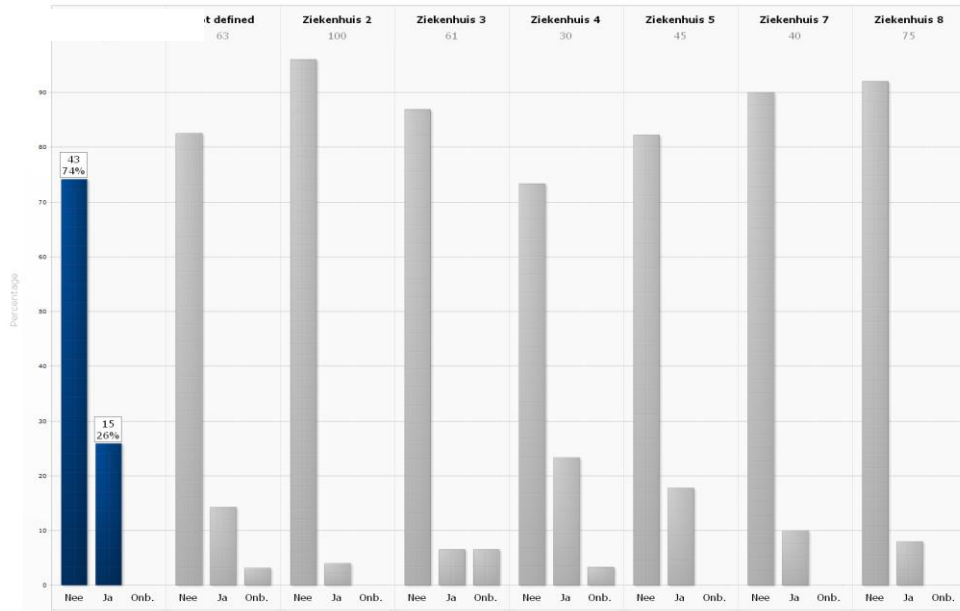

**Complicaties**

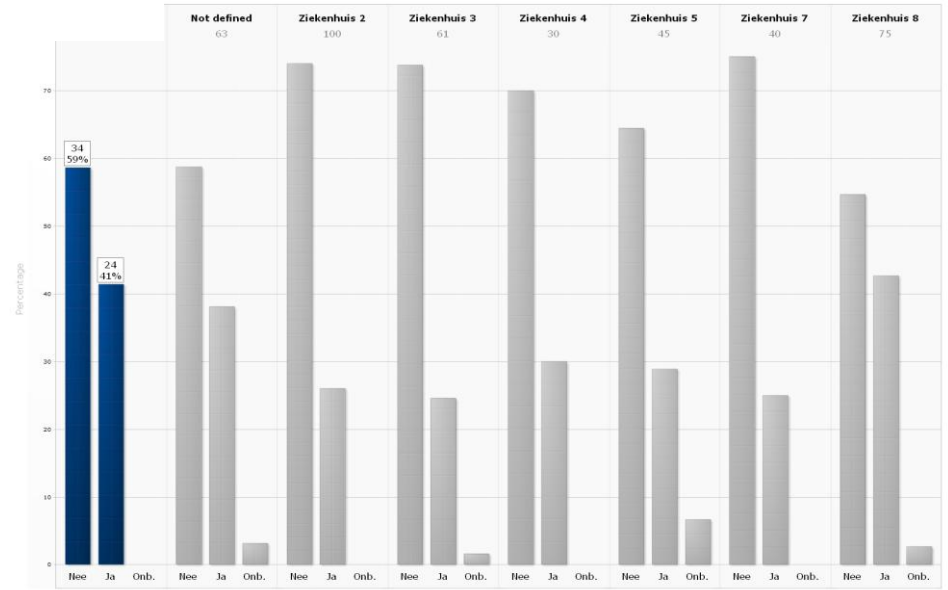

**Table 13 and 14.** Number of reinterventions and number of complications ( no/yes/ unknown). Ziekenhuis' = hospital. 'Nee' = no, 'Ja' = yes.

**Gecompliceerd beloop**

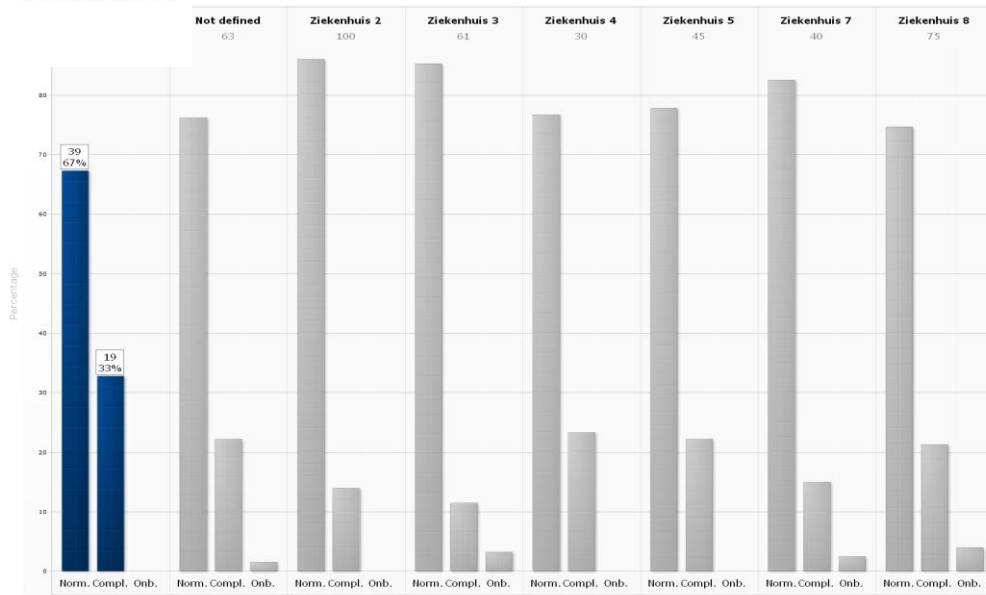

**30 dagen Mortaliteit**

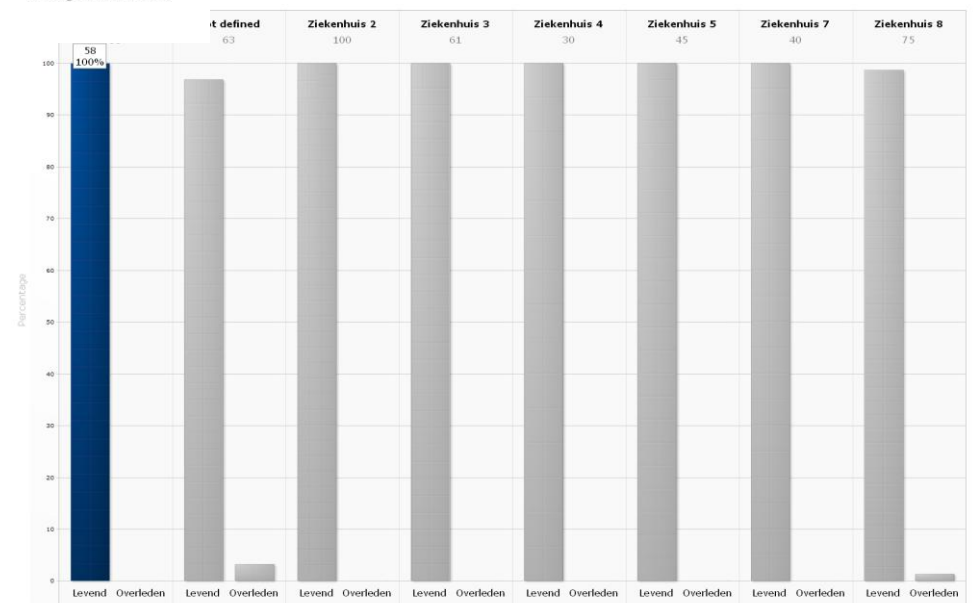

**Table 15 and 16.** Complicated course and 30-day mortality ( no/yes/unknown). 'Gecompliceerd beloop' = complicated course. '30 dagen mortaliteit' = 30-day mortality. 'Ziekenhuis' = hospital. 'Levend' = alive. 'Overleden' = deceased. 'Ziekenhuis' = hospital.

Organizational characteristics.

|                             | Hospital 1 | Hospital 2 | Hospital 3 | Hospital 4 | Hospital 5 | Hospital 6 | Hospital 7 | Hospital 8 | Mean |
|-----------------------------|------------|------------|------------|------------|------------|------------|------------|------------|------|
| Operational focus           |            |            |            |            |            |            |            |            |      |
| Autonomous work cells       |            |            |            |            |            |            |            |            |      |
| Physical lay-out            |            |            |            |            |            |            |            |            |      |
| Multi-skilled team members  |            |            |            |            |            |            |            |            |      |
| Pull planning               |            |            |            |            |            |            |            |            |      |
| Non-value adding activities |            |            |            |            |            |            |            |            |      |

**Table 17.** *Organizational characteristics measured during the in-depth analysis in your hospital.*
